# Supplementary material for: Facile formation of microscale hollow superstructures made of organic nanocrystals and their application as a humidity sensor
Source: Royal Society of Chemistry journal article supplement (doi:10.1039/c1ce06139a), 2011-12-14
Supplement: c1ce06139a.pdf [file c1ce06139a.pdf]

## Supporting Information

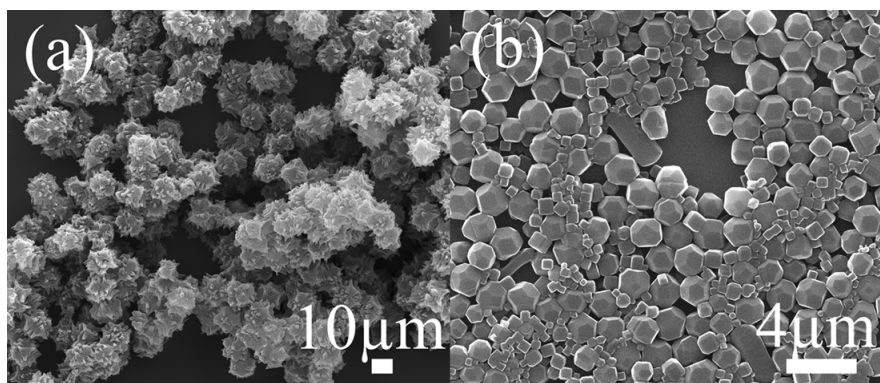

Figure S1 SEM images of products that both nucleation and growth temperature are kept at (a) 6°C (b) 25°C

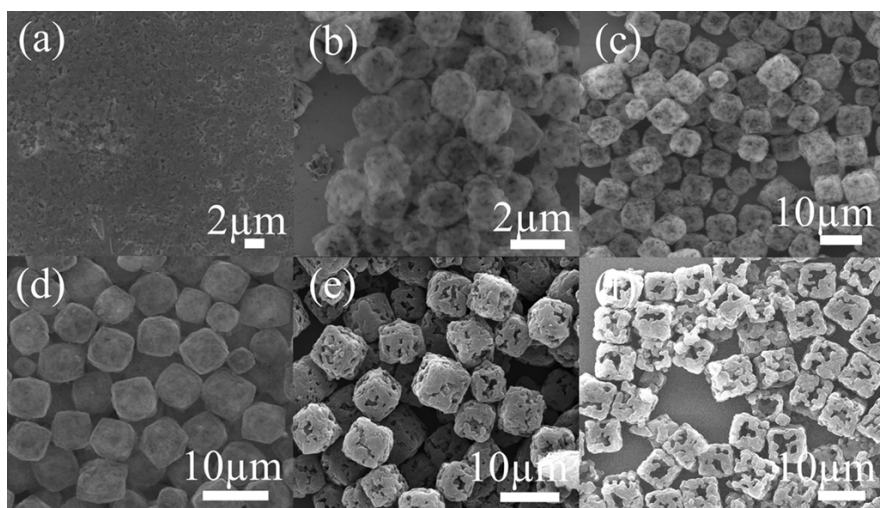

Figure S2 SEM images of morphology evolution of TBPe microcube at different time: a) 1min, b) 20min, c) 40min, d) 4h, e) 8h, f) 20h
